# Supplementary material for: Genomic Characterization of Partial Tandem Duplication Involving the KMT2A Gene in Adult Acute Myeloid Leukemia
Source: MDPI journal article supplement (doi:10.3390/cancers16091693), 2024-04-26
Supplement: s1 [file s1]

|                  |    | DNA Transcription (N=39) |       |     |      |       |      |      |      |       |       |      | Epigenetic/Histone Modification (N=38) |        |      |      |      |      | FLT3 (N=27) |          | Splicing Factors (N=16) |       |       |        | RAS,RAF, PI3K/ AKT Pathways (N=11) |      |      |       | Others (N=10) |       |      |      | JAK/STAT Pathway (N=4) |       |      |      | DNA Repair (N=2) |  |
|------------------|----|--------------------------|-------|-----|------|-------|------|------|------|-------|-------|------|----------------------------------------|--------|------|------|------|------|-------------|----------|-------------------------|-------|-------|--------|------------------------------------|------|------|-------|---------------|-------|------|------|------------------------|-------|------|------|------------------|--|
|                  |    | KMT2A-PTD                | RUNX1 | WT1 | BCOR | CEBPA | CUX1 | ETV6 | PHF6 | GATA2 | IKZF1 | IRF1 | ASXL1                                  | DNMT3A | TET2 | IDH1 | IDH2 | EZH2 | FLT3-ITD    | FLT3-TKD | U2AF1                   | SRSF2 | SF3B1 | PTPN11 | NRAS                               | KRAS | BRAF | STAG2 | CBL           | SH2B3 | NPM1 | JAK2 | CALR                   | CSF3R | JAK1 | TP53 | PPM1D            |  |
|                  |    |                          |       |     |      |       |      |      |      |       |       |      |                                        |        |      |      |      |      |             |          |                         |       |       |        |                                    |      |      |       |               |       |      |      |                        |       |      |      |                  |  |
| Variant per Gene | 41 | 12                       | 5     | 5   | 4    | 3     | 3    | 3    | 2    | 1     | 1     | 9    | 8                                      | 8      | 6    | 5    | 2    | 22   | 5           | 7        | 5                       | 4     | 2     | 5      | 3                                  | 1    | 5    | 3     | 1             | 1     | 1    | 1    | 1                      | 1     | 1    | 1    | 1                |  |
| 1                | 1  |                          |       |     |      |       |      |      |      |       |       |      |                                        |        |      |      |      |      |             |          |                         |       |       |        |                                    |      |      | 1     |               |       |      |      |                        |       |      |      |                  |  |
| 2                | 1  |                          |       |     |      |       |      |      |      |       |       |      |                                        |        |      |      |      |      |             | 1        |                         |       |       |        |                                    |      |      |       |               |       |      |      |                        |       |      |      |                  |  |
| 3                | 1  |                          |       | 1   |      |       |      |      |      |       |       |      |                                        |        |      |      |      |      |             | 1        |                         |       |       | 1      | 1                                  |      |      |       | 1             |       |      |      |                        |       |      |      |                  |  |
| 4                | 1  |                          |       |     |      | 1     |      | 1    |      |       |       |      |                                        |        |      |      |      |      |             |          |                         | 1     |       |        |                                    |      | 1    |       |               |       |      |      |                        | 1     |      |      |                  |  |
| 5                | 1  | 1                        |       |     |      |       |      |      |      |       |       |      | 1                                      |        |      | 1    | 1    | 1    |             |          |                         |       |       |        |                                    |      |      |       |               |       |      |      |                        |       |      |      |                  |  |
| 6                | 1  |                          |       |     |      |       |      |      |      |       |       |      |                                        |        |      |      |      | 1    | 1           | 1        |                         |       |       |        |                                    |      |      |       |               |       |      |      |                        |       |      |      |                  |  |
| 7                | 1  |                          |       |     |      |       |      |      |      |       |       |      |                                        |        |      |      |      |      |             |          |                         |       |       |        |                                    |      |      |       |               |       |      |      |                        |       |      |      |                  |  |
| 8                | 1  | 1                        |       | 1   |      |       |      |      |      |       |       |      |                                        |        |      |      |      | 1    |             | 1        |                         |       |       |        | 1                                  |      |      |       | 1             |       |      |      |                        |       |      |      |                  |  |
| 9                | 1  | 2                        | 2     |     |      |       |      |      |      |       |       |      |                                        | 1      |      |      |      | 1    |             |          |                         |       | 2     |        |                                    |      |      |       |               |       |      |      |                        |       |      |      |                  |  |
| 10               | 1  |                          |       |     |      |       |      |      |      |       |       |      |                                        |        |      |      |      |      |             |          |                         |       |       |        |                                    |      |      |       |               |       |      |      |                        |       |      |      |                  |  |
| 11               | 1  |                          |       |     |      | 1     |      |      |      |       |       |      | 1                                      |        | 1    |      |      |      |             |          |                         |       |       |        | 1                                  |      |      |       |               |       |      |      |                        |       |      |      | 1                |  |
| 12               | 1  |                          |       |     |      |       | 1    |      |      |       |       |      |                                        |        | 1    |      |      |      |             |          |                         |       |       |        |                                    |      |      |       |               |       |      |      |                        |       |      |      |                  |  |
| 13               | 1  |                          | 1     |     |      |       |      |      |      |       |       |      |                                        | 1      |      |      | 1    | 2    |             |          |                         |       |       |        |                                    |      |      |       |               |       |      |      |                        |       |      |      |                  |  |
| 14               | 1  |                          |       |     |      |       |      |      |      |       |       |      |                                        |        |      | 1    |      | 1    |             |          |                         | 1     |       |        |                                    | 1    |      |       |               |       |      |      |                        |       |      |      |                  |  |
| 15               | 1  |                          |       |     |      |       |      |      |      |       |       |      |                                        |        |      |      |      |      |             | 1        |                         |       | 1     |        |                                    |      |      |       |               |       |      |      |                        |       |      |      |                  |  |
| 16               | 1  |                          |       |     |      |       |      |      |      |       |       |      |                                        |        |      |      |      |      |             | 1        |                         |       | 1     |        |                                    |      |      |       |               |       |      |      |                        |       |      |      |                  |  |
| 17               | 1  |                          |       |     |      |       |      |      |      |       |       |      | 1                                      |        | 1    |      |      |      |             |          |                         |       |       |        |                                    |      |      |       |               |       |      |      |                        |       |      |      |                  |  |
| 18               | 1  |                          |       |     | 1    |       |      |      |      |       |       |      |                                        |        |      |      |      | 1    |             |          |                         |       |       |        |                                    |      |      |       |               |       |      |      |                        |       |      |      |                  |  |
| 19               | 1  | 1                        |       |     | 1    |       |      |      |      |       |       |      |                                        |        |      |      |      | 2    | 1           |          |                         |       |       |        |                                    |      |      |       |               |       |      |      |                        |       |      |      |                  |  |
| 20               | 1  |                          |       |     | 1    |       |      |      |      |       |       |      | 1                                      |        |      |      |      |      |             |          |                         |       |       |        |                                    |      | 1    |       |               |       |      |      |                        |       |      |      |                  |  |
| 21               | 1  |                          |       |     |      |       | 2    |      |      |       |       |      |                                        | 2      | 1    |      |      | 1    |             |          |                         |       |       |        |                                    |      |      |       |               |       |      |      |                        |       |      |      |                  |  |
| 22               | 1  |                          |       | 1   |      |       |      |      |      |       |       |      |                                        |        |      |      |      |      |             | 1        |                         |       |       |        |                                    |      |      |       |               |       |      |      |                        |       |      |      |                  |  |
| 23               | 1  |                          |       |     |      |       |      | 1    |      |       |       |      | 1                                      | 1      |      |      |      | 2    |             |          |                         |       |       |        |                                    |      |      |       |               |       |      |      |                        |       |      |      |                  |  |
| 24               | 1  | 1                        |       |     |      | 1     |      |      |      |       |       |      | 1                                      |        |      |      |      |      | 1           |          |                         |       |       |        | 1                                  |      |      |       |               |       |      |      | 1                      |       |      |      |                  |  |
| 25               | 1  |                          |       |     |      |       |      |      |      |       |       |      |                                        |        |      | 1    |      |      |             |          |                         |       |       |        | 1                                  |      |      |       |               |       |      |      |                        |       |      |      |                  |  |
| 26               | 1  | 1                        | 1     | 1   |      | 1     |      |      |      |       |       |      |                                        | 1      |      |      |      | 2    |             |          |                         |       |       |        |                                    |      |      |       |               |       |      |      |                        |       |      |      |                  |  |
| 27               | 1  |                          |       |     |      |       |      |      |      |       |       |      | 1                                      |        | 2    |      |      |      |             |          |                         |       |       |        |                                    |      |      |       |               |       |      |      |                        |       |      |      |                  |  |
| 28               | 1  |                          |       | 1   |      |       |      |      |      |       |       |      |                                        |        |      |      | 1    |      |             |          |                         |       |       |        |                                    |      |      |       |               |       |      |      |                        |       |      | 1    |                  |  |
| 29               | 1  | 1                        |       | 1   |      |       |      |      |      |       |       |      |                                        |        |      | 1    |      |      | 2           |          | 1                       |       |       |        |                                    |      | 1    |       |               |       |      |      |                        |       |      |      |                  |  |
| 30               | 1  | 1                        |       |     |      |       |      |      |      |       |       |      | 1                                      | 1      |      |      |      | 1    |             |          |                         |       |       |        |                                    |      |      |       |               |       |      |      |                        |       |      |      |                  |  |
| 31               | 1  |                          |       |     |      |       |      |      |      |       |       |      | 1                                      |        |      |      |      |      |             |          |                         |       |       |        |                                    |      |      |       |               |       |      |      |                        |       |      |      |                  |  |
| 32               | 1  |                          |       |     |      |       |      |      |      |       |       |      |                                        |        |      |      |      |      |             |          | 1                       |       |       |        |                                    |      |      |       |               |       |      |      | 1                      |       |      |      |                  |  |
| 33               | 1  |                          |       |     |      |       |      |      |      |       |       |      | 1                                      |        |      |      |      | 3    |             |          |                         |       |       |        |                                    |      |      |       |               |       |      | 1    |                        |       |      |      |                  |  |
| 34               | 1  | 1                        |       |     |      |       |      |      |      |       | 1     |      |                                        |        |      |      |      | 2    |             | 1        |                         |       |       |        |                                    |      |      |       |               |       |      |      |                        |       |      |      |                  |  |
| 35               | 1  |                          |       |     |      | 1     |      |      |      | 1     |       |      |                                        |        |      |      |      |      |             |          |                         |       |       |        |                                    |      |      | 1     | 1             |       |      |      |                        |       |      |      |                  |  |
| 36               | 1  |                          | 1     |     |      |       |      | 2    |      |       |       |      |                                        |        |      |      |      |      |             |          |                         |       |       |        |                                    |      |      |       |               |       |      |      |                        |       |      |      |                  |  |
| 37               | 1  | 1                        | 1     |     |      |       |      |      |      |       |       |      | 1                                      |        |      | 1    |      | 1    |             |          | 1                       |       |       |        |                                    |      |      | 1     |               |       |      |      |                        |       |      |      |                  |  |
| 38               | 1  | 1                        |       |     |      |       |      |      |      |       |       |      | 1                                      |        | 1    |      |      |      |             |          | 1                       |       |       |        |                                    | 1    |      |       |               |       |      |      |                        |       |      |      |                  |  |
| 39               | 1  |                          |       |     |      |       |      |      |      |       |       |      | 1                                      |        |      |      | 1    |      |             |          |                         |       |       |        |                                    | 1    |      |       |               |       |      |      |                        |       |      |      |                  |  |
| 40               | 1  |                          |       |     |      |       |      |      |      |       |       |      | 1                                      |        |      |      |      |      |             |          |                         |       | 1     |        |                                    |      |      |       |               |       |      |      |                        |       |      |      |                  |  |
| 41               | 1  |                          |       |     |      |       |      |      |      |       |       |      |                                        |        |      |      |      |      |             |          |                         |       |       |        |                                    |      |      |       |               |       |      |      |                        |       |      |      | 1                |  |

**Figure S1. Co-occurring variants identified in KMT2A-PTD positive cases by NGS.** Note that cases 2, 3 and 35 were determined not to have a KMT2A-PTD by MLPA and/or OGM. Variants were classified using the AMP/CAP/ASCO somatic variant classification guidelines (Li et al., 2017, PMID: 27993330). Red: Tier-1 and Tier 2. Grey: Tier-3.
