# Supplementary material for: Genomic Characterization of Partial Tandem Duplication Involving the KMT2A Gene in Adult Acute Myeloid Leukemia
Source: MDPI journal article supplement (doi:10.3390/cancers16091693), 2024-04-26
Supplement: s1 [file s1]

**Table S1. Clinical features of KMT2A-PTD patients identified by heme-NGS.**

Note that cases 2, 3 and 35 were determined not to have a KMT2A-PTD by MLPA and/or OGM. AML: Acute Myeloid Leukemia. t-AML: therapy related AML. AML-NOS: AML Not otherwise specified. AML-MR: AML myelodysplasia related. MDS-EB2: MDS with excess blast 2. BPDCN. Blastic plasmacytoid dendritic cell neoplasm.

| Case | Age | Gender | Final Diagnosis  | Blast | WBC (10 <sup>9</sup> /L) | Platelets (10 <sup>9</sup> /L) | Hemoglobin (g/L) |
|------|-----|--------|------------------|-------|--------------------------|--------------------------------|------------------|
| 1    | 3   | F      | AML              | n/a   | n/a                      | n/a                            | n/a              |
| 2    | 67  | M      | t-AML            | 24%   | 1.8                      | 17                             | 74               |
| 3    | 40  | M      | AML-NOS          | 95%   | 37.9                     | 72                             | 122              |
| 4    | 55  | M      | AML-MR           | 19%   | 8.5                      | 11                             | n/a              |
| 5    | 38  | F      | AML-MR           | 85%   | 137.6                    | 56                             | 95               |
| 6    | 74  | M      | AML              | 46%   | 6.1                      | 61                             | 71               |
| 7    | 68  | M      | AML-MR           | 72%   | 119.5                    | 20                             | 86               |
| 8    | 62  | M      | AML-MR           | 40%   | n/a                      | n/a                            | n/a              |
| 9    | 88  | M      | AML-MR           | 49%   | 76.4                     | 73                             | 86               |
| 10   | 82  | M      | AML-NOS          | 92%   | 18.5                     | 38                             | 81               |
| 11   | 22  | M      | AML-NOS          | 60%   | 27.9                     | 110                            | 94               |
| 12   | 70  | M      | AML-MR           | 90%   | n/a                      | 115                            | 80               |
| 13   | 77  | M      | t-AML            | 57%   | 7.2                      | 35                             | 92               |
| 14   | 78  | M      | AML-MR           | 80%   | 81.9                     | 134                            | 128              |
| 15   | 88  | M      | AML-MR           | 83%   | n/a                      | n/a                            | n/a              |
| 16   | 68  | F      | AML-MR           | 30%   | 2.7                      | 3                              | 64               |
| 17   | 62  | M      | AM-MR            | 90%   | 1.8                      | 11                             | 69               |
| 18   | 85  | M      | AML-NOS          | 65%   | n/a                      | n/a                            | n/a              |
| 19   | 45  | F      | AML-MR           | 85%   | 51.6                     | 16                             | 91               |
| 20   | 59  | M      | AML-NOS          | 59%   | 3.6                      | 122                            | 105              |
| 21   | 53  | M      | AML-NOS          | 75%   | 4.9                      | 12                             | 70               |
| 22   | 70  | M      | AML-MR           | 25%   | 1.1                      | 177                            | 87               |
| 23   | 77  | F      | AML-NOS          | 14%   | 46.9                     | 50                             | 70               |
| 24   | 84  | M      | AML-NOS          | 21%   | 29.1                     | 44                             | 93               |
| 25   | 71  | M      | AML              | 40%   | n/a                      | n/a                            | n/a              |
| 26   | 32  | F      | AML-MR           | 79%   | n/a                      | n/a                            | n/a              |
| 27   | 86  | M      | MDS-EB2          | 16%   | n/a                      | 49                             | 111              |
| 28   | 79  | M      | AML-MR           | 63%   | n/a                      | n/a                            | n/a              |
| 29   | 76  | M      | AML-MR           | 65%   | 12.5                     | 60                             | 72               |
| 30   | 81  | F      | AML-MR           | 70%   | 146.4                    | 91                             | 92               |
| 31   | 82  | M      | MPAL             | n/a   | n/a                      | n/a                            | n/a              |
| 32   | 76  | M      | Myelofibrosis    | 5%    | 34.5                     | 318                            | 95               |
| 33   | 43  | M      | NPM1 mutated AML | 47%   | 45                       | 66                             | 117              |
| 34   | 79  | M      | AML-MR           | 60%   | 245.3                    | 71                             | 64               |
| 35   | 25  | F      | AML              | 90%   | 37.6                     | 43                             | 109              |
| 36   | 65  | M      | AML              | 29%   | n/a                      | n/a                            | n/a              |
| 37   | 64  | M      | AML-MR           | 20%   | 17                       | 107                            | 87               |
| 38   | 74  | M      | AML-MR           | 40%   | 83.2                     | 33                             | 93               |
| 39   | 81  | F      | BPDCN            | 10%   | 10.5                     | 222                            | 145              |
| 40   | 73  | F      | AML-MR           | 23%   | n/a                      | n/a                            | n/a              |
| 41   | 64  | M      | AML-MR           | 36%   | 6                        | 21                             | 79               |
